# Supplementary material
Source: PubMed Central journal article supplement (PMC3485731)
Supplement: AEM.01444-12_zam999103777so1.pdf [file AEM.01444-12_zam999103777so1.pdf]

Table S1. Fermentation parameters and significance of differences

| Strains     | Maximum specific growth rate (1/hr) |           |                   | Biomass yield [g/g-substrate] |           |                   | Specific galactose uptake rate (mmol/g DCW/hr) |           |                   | Specific Ethanol production rate (mmol/g DCW/hr) |           |                   |
|-------------|-------------------------------------|-----------|-------------------|-------------------------------|-----------|-------------------|------------------------------------------------|-----------|-------------------|--------------------------------------------------|-----------|-------------------|
|             | Mean (n=2)                          | STD (n=2) | p-value in t-test | Mean (n=2)                    | STD (n=2) | p-value in t-test | Mean (n=2)                                     | STD (n=2) | p-value in t-test | Mean (n=2)                                       | STD (n=2) | p-value in t-test |
| <b>5DU</b>  | 0.16                                | ±0.00     |                   | 0.32                          | ±0.02     |                   | 2.82                                           | ±0.20     |                   | 1.36                                             | ±0.30     |                   |
| <b>RAU</b>  | 0.23                                | ±0.01     | 0.002             | 0.29                          | ±0.00     | 0.058             | 4.43                                           | ±0.09     | 0.005             | 3.32                                             | ±0.05     | 0.006             |
| <b>RBU</b>  | 0.18                                | ±0.00     | 0.013             | 0.27                          | ±0.01     | 0.037             | 3.63                                           | ±0.18     | 0.025             | 2.58                                             | ±0.11     | 0.016             |
| <b>EBU</b>  | 0.17                                | ±0.00     | 0.038             | 0.29                          | ±0.01     | 0.084             | 3.30                                           | ±0.11     | 0.049             | 1.49                                             | ±0.06     | 0.304             |
| <b>PGM2</b> | 0.21                                | ±0.01     | 0.016             | 0.29                          | ±0.02     | 0.097             | 3.96                                           | ±0.02     | 0.007             | 3.79                                             | ±0.27     | 0.007             |
| <b>RAP</b>  | 0.26                                | ±0.00     | 0.000             | 0.37                          | ±0.02     | 0.038             | 3.82                                           | ±0.15     | 0.014             | 2.47                                             | ±0.06     | 0.018             |
| <b>RBP</b>  | 0.26                                | ±0.03     | 0.019             | 0.34                          | ±0.02     | 0.200             | 4.22                                           | ±0.18     | 0.009             | 2.91                                             | ±0.09     | 0.010             |
| <b>EBP</b>  | 0.26                                | ±0.00     | 0.000             | 0.36                          | ±0.02     | 0.065             | 4.02                                           | ±0.24     | 0.016             | 2.43                                             | ±0.22     | 0.028             |
| <b>7D</b>   | 0.21                                | ±0.00     |                   | 0.38                          | ±0.00     |                   | 3.10                                           | ±0.04     |                   | 1.20                                             | ±0.04     |                   |
| <b>62A</b>  | 0.26                                | ±0.00     | 0.001             | 0.39                          | ±0.01     | 0.087             | 3.67                                           | ±0.06     | 0.004             | 1.57                                             | ±0.03     | 0.004             |
| <b>62B</b>  | 0.26                                | ±0.00     | 0.002             | 0.37                          | ±0.00     | 0.045             | 3.91                                           | ±0.04     | 0.001             | 2.23                                             | ±0.18     | 0.008             |
